# Supplementary material for: Keggin-based 3D frameworks tuned by silver polymeric motifs: effect of the bi(triazole) substituent group on the architectures
Source: Royal Society of Chemistry journal article supplement (doi:10.1039/c4ce00147h), 2014-01-01
Supplement: c4ce00147h1.pdf [file c4ce00147h1.pdf]

Supplementary Material (ESI) for CrystEngComm  
This journal is © The Royal Society of Chemistry

## Keggin-based 3D Frameworks Tuned by Silver Polymeric Motifs: Effect of Substituent Group of Bi(triazole) on the Architectures

Xiu-Li Wang,\* Jing-Jing Cao, Guo-Cheng Liu, Ai-Xiang Tian, Jian Luan, Hong-Yan  
Lin, Ju-Wen Zhang, Na Li

Table S1. Selected bond lengths (Å) and bond angles (°) for compounds **1**, **2** and **3**.

| Compound 1           |           |                      |           |
|----------------------|-----------|----------------------|-----------|
| Ag(1)-N(1)           | 2.236(9)  | Ag(1)-N(2)           | 2.251(11) |
| Ag(1)-O(18)#2        | 2.418(10) | Ag(1)-O(20)          | 2.527(9)  |
| Ag(2)-N(3)#3         | 2.194(10) | Ag(2)-N(4)#4         | 2.200(10) |
| Ag(2)-O(12)          | 2.696(9)  | Ag(2)-O(23)#1        | 2.583(10) |
| Ag(2)-O(21)          | 2.506(9)  |                      |           |
| O(18) #2-Ag(1)-O(20) | 139.3(4)  | N(1)-Ag(1)-N(2)      | 152.8(4)  |
| N(1)-Ag(1)-O(18)#2   | 102.7(4)  | N(2)-Ag(1)-O(18)#2   | 94.6(4)   |
| N(1)-Ag(1)-O(20)     | 89.6(3)   | N(2)-Ag(1)-O(20)     | 90.9(3)   |
| N(3)#3 -Ag(2)-O(21)  | 93.9(4)   | N(3)#3-Ag(2)-N(4)#4  | 166.9(4)  |
| O(21)-Ag(2)-O(23)#1  | 93.2(3)   | N(4)#4-Ag(2)-O(21)   | 90.3(4)   |
| N(3)#3-Ag(2)-O(23)#1 | 104.7(3)  | N(4)#4-Ag(2)-O(23)#1 | 87.5(3)   |

Symmetry codes for **1**: #1  $-x, y + 1/2, z$ ; #2  $-x + 1, y + 1/2, z$ ; #3  $x, -y + 3/2, -z$ ;  
#4  $x - 1, y, z$ ; #5  $x, y, -z + 1/2$ .

| Compound 2  |           |               |           |
|-------------|-----------|---------------|-----------|
| Ag(1)-N(1)  | 2.20(2)   | Ag(1)-N(6)    | 2.25(2)   |
| Ag(1)-O(15) | 2.515(19) | Ag(1)-O(24)#1 | 2.44(2)   |
| Ag(2)-N(4)  | 2.19(2)   | Ag(2)-N(5)#2  | 2.18(2)   |
| Ag(2)-O(2)  | 2.667(2)  | Ag(2)-O(14)   | 2.732(18) |

\* Corresponding author. Tel: +86-416-3400158 E-mail address: [wangxiuli@bhu.edu.cn](mailto:wangxiuli@bhu.edu.cn) (X.-L. Wang)

**Supplementary Material (ESI) for CrystEngComm**  
**This journal is © The Royal Society of Chemistry**

|                    |           |                      |           |
|--------------------|-----------|----------------------|-----------|
| Ag(2)-O(19)#3      | 2.58 (2)  | N(1)-Ag(1)-O(15)     | 93.7(8)   |
| N(1)-Ag(1)-O(24)#1 | 103.0(10) | N(1)-Ag(1)-N(6)      | 153.6(10) |
| O(24) -Ag(1)-O(15) | 133.8(9)  | N(6)-Ag(1)-O(24)#1   | 89.7(10)  |
| N(6)-Ag(1)-O(15)   | 93.7(9)   | N(5)#7-Ag(2)-O(19)#3 | 96.7(7)   |
| N(5)#2-Ag(2)-N(4)  | 169.7(8)  | N(4)-Ag(2)-O(19)#3   | 87.3(8)   |

Symmetry codes for **2**: #1  $-x, y + 1/2, -z + 1/2$ ; #2  $x + 1, -y - 1/2, -z$ ; #3  $x + 1, y, z$ .

**Compound 3**

|                      |           |                      |           |
|----------------------|-----------|----------------------|-----------|
| Ag(1)-N(5)           | 2.143(18) | Ag(1)-O(2W)          | 2.28(3)   |
| Ag(1)-N(14)          | 2.515(19) | Ag(1)-O(13)          | 2.670(7)  |
| Ag(1)-O(9)           | 2.614(15) | Ag(2)-N(1)#2         | 2.131(18) |
| Ag(2)-N(2)           | 2.199(16) | Ag(2)-O(10)#3        | 2.54(4)   |
| Ag(3)-N(7)#4         | 2.301(19) | Ag(3)-N(9)#4         | 2.478(17) |
| Ag(3)-O(12)#3        | 2.471(14) | Ag(3)-O(20)          | 2.488(16) |
| Ag(3)-O(1W)          | 2.58(7)   | Ag(4)-N(11)#5        | 2.16(2)   |
| Ag(4)-N(12)          | 2.64(2)   | Ag(4)-O(1)#1         | 2.400(13) |
| Ag(4)-O(18)          | 2.437(14) | N(5)-Ag(1)-O(2W)     | 101.6(9)  |
| N(5)-Ag(1)-N(14)     | 121.1(6)  | O(2W)-Ag(1)-N(14)    | 120.8(9)  |
| N(1)#2-Ag(2)-N(2)    | 169.6(7)  | N(1)#2-Ag(2)-O(10)#3 | 89.9(13)  |
| N(7)#4-Ag(3)-O(12)#3 | 119.1(6)  | N(7)#4-Ag(3)-N(9)#4  | 98.0(6)   |
| O(12)#3-Ag(3)-N(9)#4 | 88.6(5)   | N(7)#4-Ag(3)-O(20)   | 85.1(6)   |
| O(12)#3-Ag(3)-O(20)  | 82.8(5)   | N(9)#4-Ag(3)-O(20)   | 171.3(5)  |
| N(11)#5-Ag(4)-O(1)#1 | 137.4(6)  | N(11)#5-Ag(4)-O(18)  | 99.8(6)   |
| O(1)#1-Ag(4)-O(18)   | 114.3(5)  |                      |           |

Symmetry codes for **3**: #1  $-x + 2, -y + 1, -z + 1$ ; #2  $-x + 2, y - 1/2, -z + 3/2$ ; #3  $x + 1, -y + 1/2, z + 1/2$ ; #4  $x, -y + 1/2, z - 1/2$ ; #5  $-x + 2, y + 1/2, -z + 3/2$ .

**Table S2.** The conformations of ligands and the dihedral angles between the triazoles

|                    |                                                                                   |                                                                                   |                                                                                    |                                                                                     |
|--------------------|-----------------------------------------------------------------------------------|-----------------------------------------------------------------------------------|------------------------------------------------------------------------------------|-------------------------------------------------------------------------------------|
| Configuration      |  |  |  |  |
| Ligands            | a- L <sup>1</sup>                                                                 | b- L <sup>1</sup>                                                                 | a- L <sup>2</sup>                                                                  | b- L <sup>2</sup>                                                                   |
| Dihedral angle (°) | 20.72                                                                             | 40.37                                                                             | 10.56                                                                              | 40.07                                                                               |

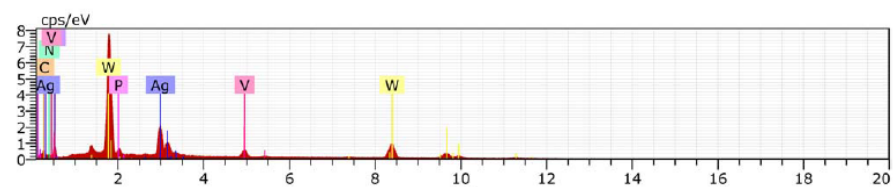

(a)

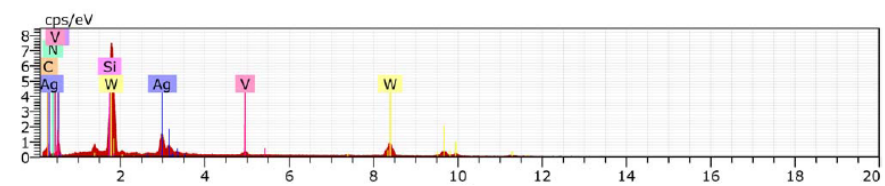

(b)

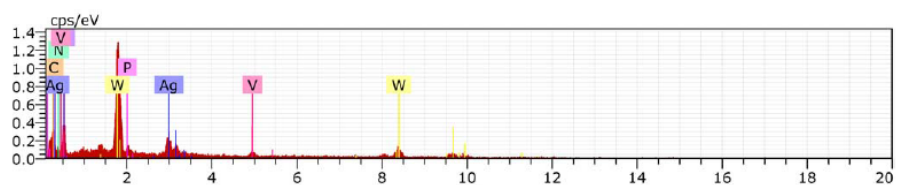

(c)

**Fig. S1.** The EDS spectra of compounds **1** (a), **2** (b) and **3** (c).

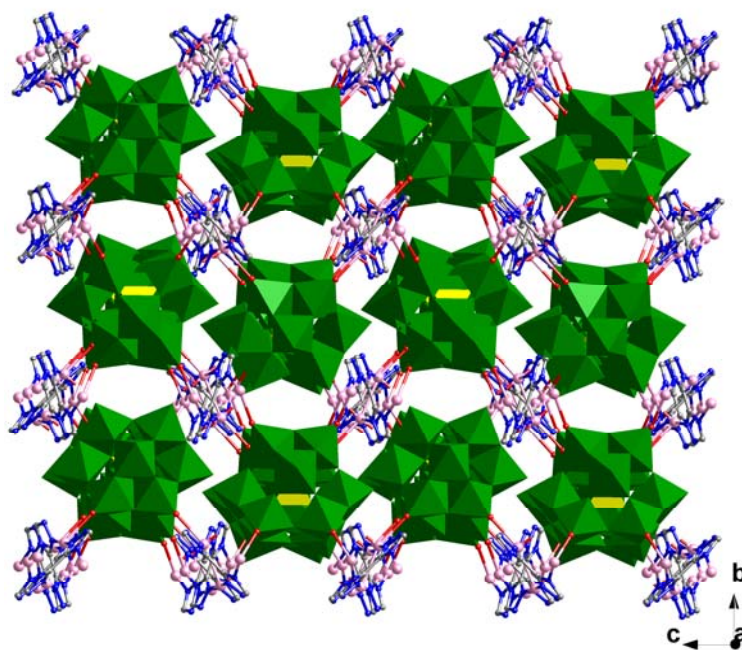

Fig. S2. Polyhedral and ball/stick view of the 3D framework of compound 1.

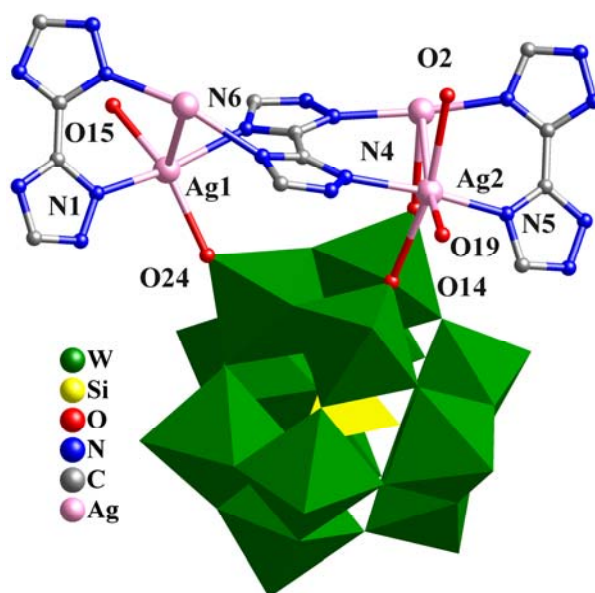

Fig. S3. Ball/stick and polyhedral view of the asymmetric unit of compound 2.  
Compared with compound 1, Ag1 ion in compound 2 is five-coordinated and there is no coordination water molecule.

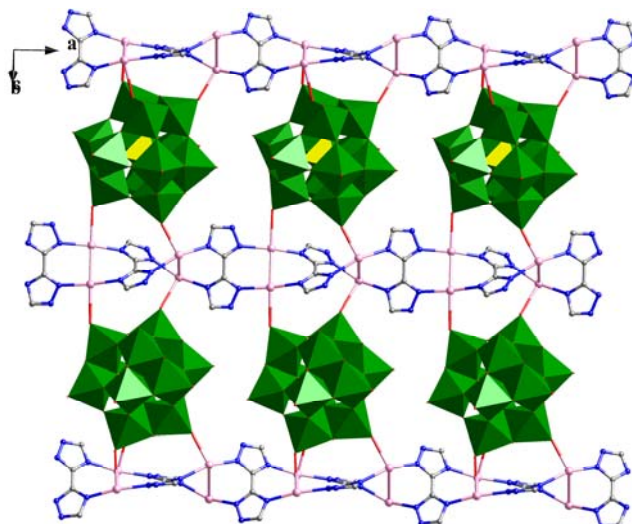

**Fig. S4.** Polyhedral and ball/stick view of the 2D network of compound 2.

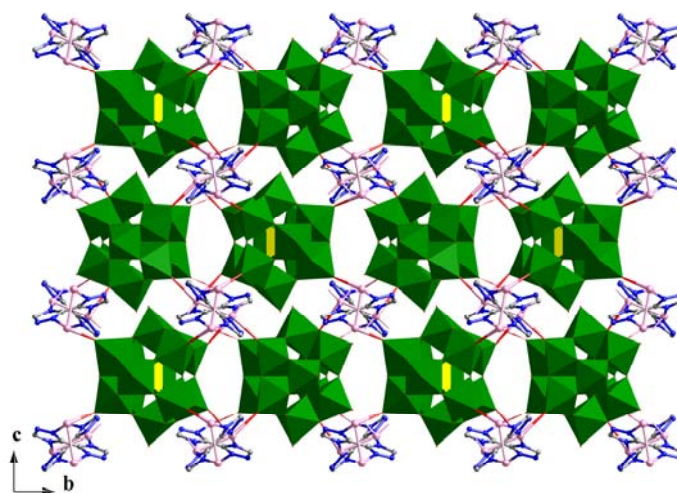

**Fig. S5.** Polyhedral and ball/stick view of the 3D framework of compound 2.

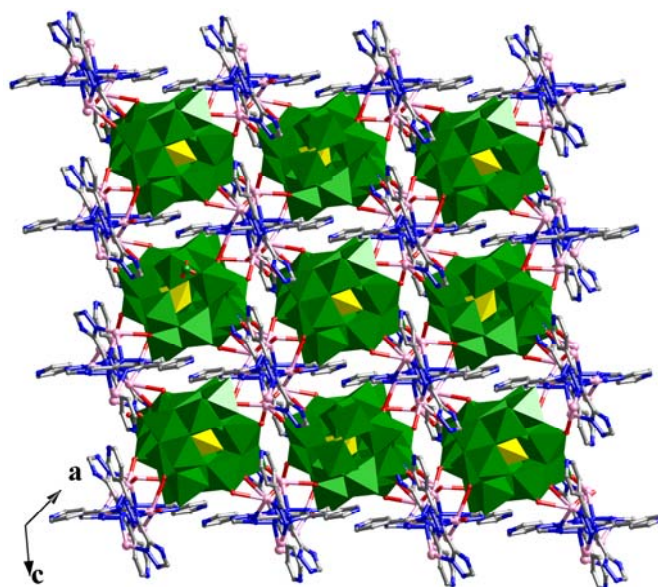

**Fig. S6.** Polyhedral and ball/stick view of the 3D framework of compound 3.

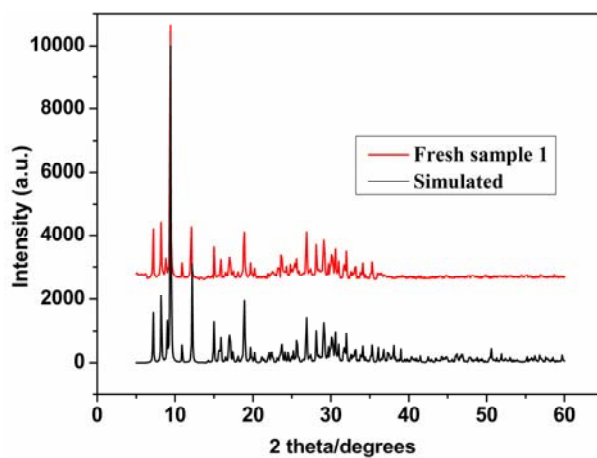

(a)

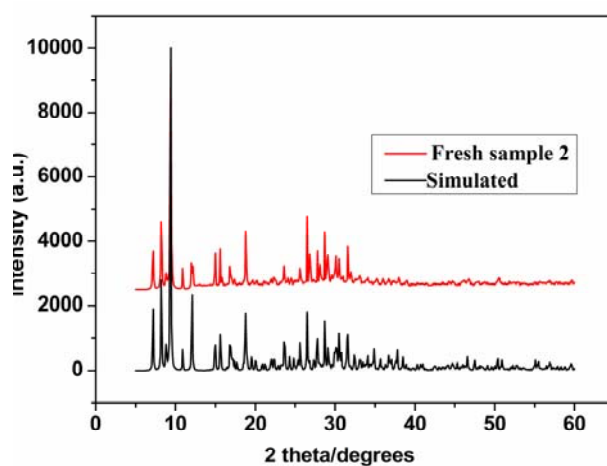

(b)

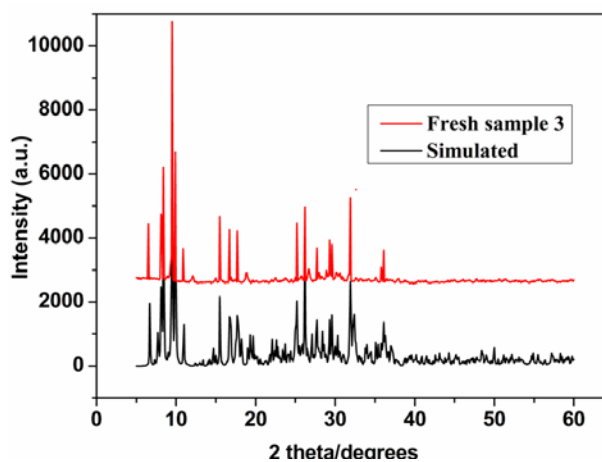

(c)

**Fig. S7.** The PXRD patterns of compounds **1** (a), **2** (b) and **3** (c).



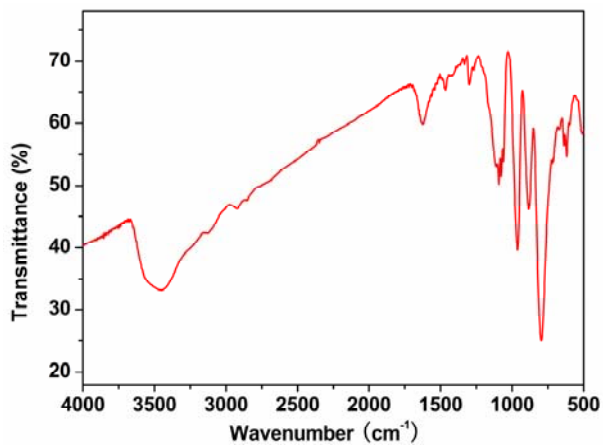

(a)

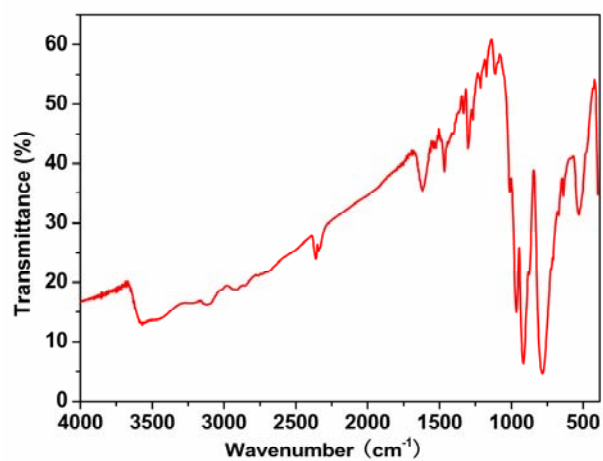

(b)

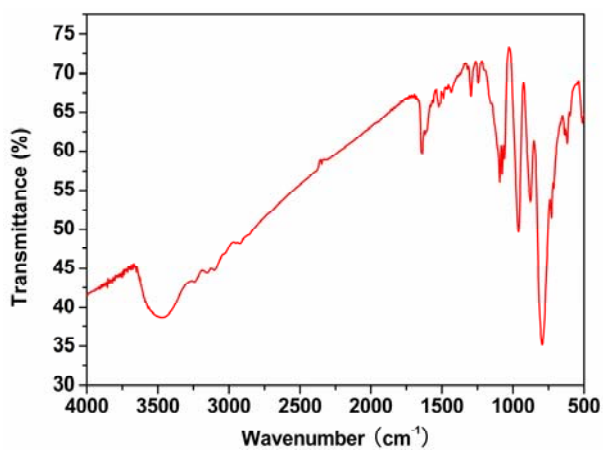

(c)

**Fig. S8.** The IR spectra of compounds **1** (a), **2** (b) and **3** (c).

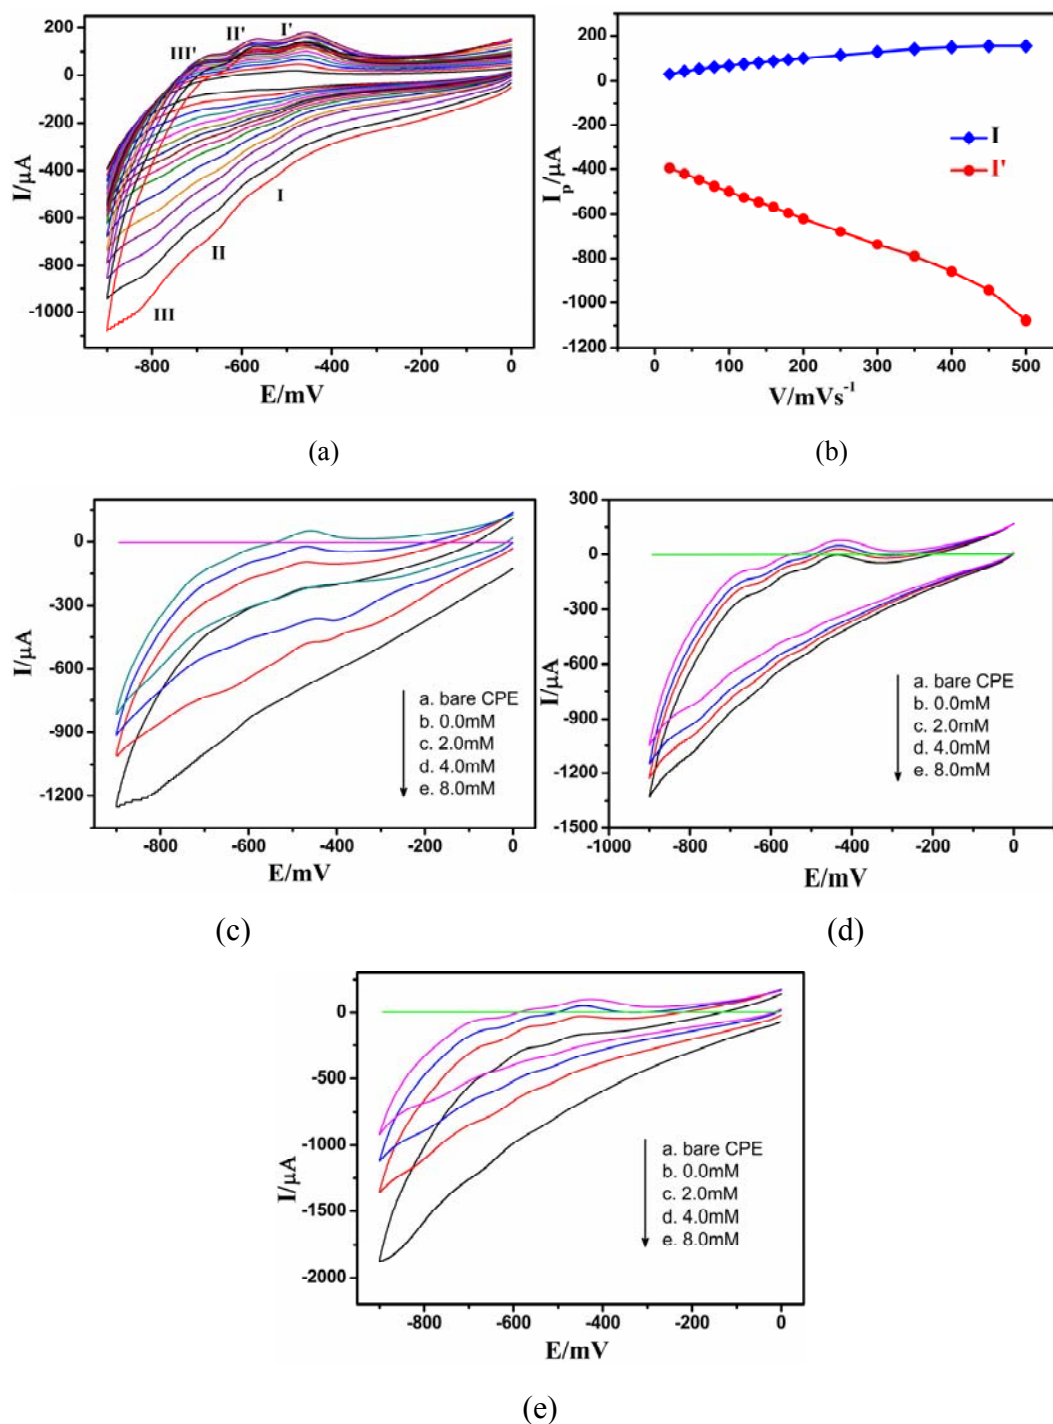

**Fig. S9.** (a) Cyclic voltammograms of **2-CPE** in a 0.1 M  $\text{H}_2\text{SO}_4$  + 0.5 M  $\text{Na}_2\text{SO}_4$  aqueous solution at different scan rates (from inner to outer: 20, 40, 60, 80, 100, 120, 140, 160, 180, 200, 250, 300, 350, 400, 450 and 500  $\text{mV/s}$ ). (b) The plots of the anodic and cathodic peak currents against scan rates of **2-CPE**. (c) Cyclic voltammograms of **2-CPE** in a 0.1 M  $\text{H}_2\text{SO}_4$  + 0.5 M  $\text{Na}_2\text{SO}_4$  aqueous solution containing 0.0–8.0 mM  $\text{KNO}_2$  and a bare CPE in a 0.1 M  $\text{H}_2\text{SO}_4$  + 0.5



## Supplementary Material (ESI) for CrystEngComm

This journal is © The Royal Society of Chemistry

M Na<sub>2</sub>SO<sub>4</sub> mixed solution. Scan rate: 200 mV/s. (d) Cyclic voltammograms of **2**-CPE in a 0.1 M H<sub>2</sub>SO<sub>4</sub> + 0.5 M Na<sub>2</sub>SO<sub>4</sub> aqueous solution containing 0.0–10.0 mM H<sub>2</sub>O<sub>2</sub> and a bare CPE in a 0.1 M H<sub>2</sub>SO<sub>4</sub> + 0.5 M Na<sub>2</sub>SO<sub>4</sub> mixed solution. Scan rate: 200 mV/s. (e) Cyclic voltammograms of **2**-CPE in a 0.1 M H<sub>2</sub>SO<sub>4</sub> + 0.5 M Na<sub>2</sub>SO<sub>4</sub> aqueous solution containing 0.0–8.0 mM KBrO<sub>3</sub> and a bare CPE in a 0.1 M H<sub>2</sub>SO<sub>4</sub> + 0.5 M Na<sub>2</sub>SO<sub>4</sub> mixed solution. Scan rate: 200 mV/s.

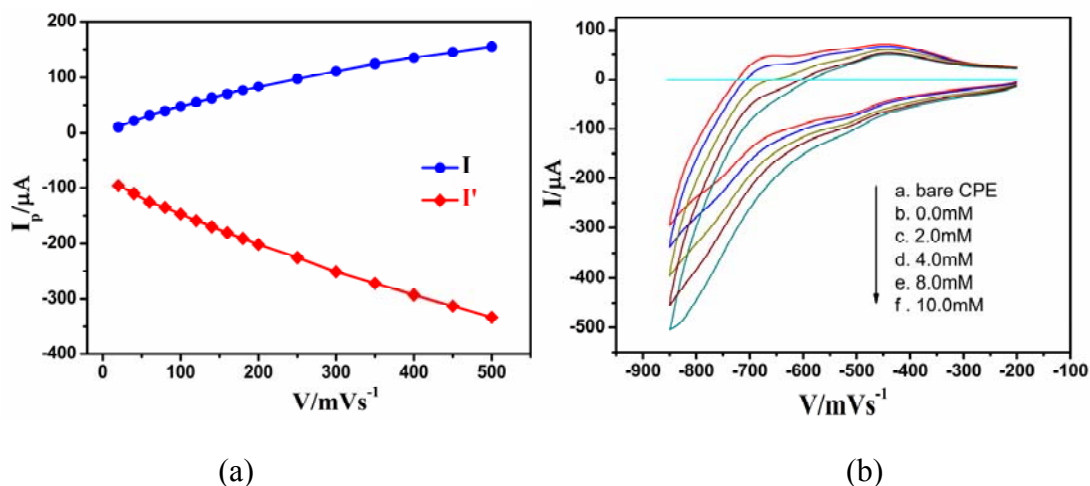

**Fig. S10.** (a) The plots of the anodic and cathodic peak currents against scan rates of **3**-CPE. (b) Cyclic voltammograms of **3**-CPE in a 0.1 M H<sub>2</sub>SO<sub>4</sub> + 0.5 M Na<sub>2</sub>SO<sub>4</sub> aqueous solution containing 0.0–8.0 mM KNO<sub>2</sub> and a bare CPE in a 0.1 M H<sub>2</sub>SO<sub>4</sub> + 0.5 M Na<sub>2</sub>SO<sub>4</sub> mixed solution. Scan rate: 200 mV/s.

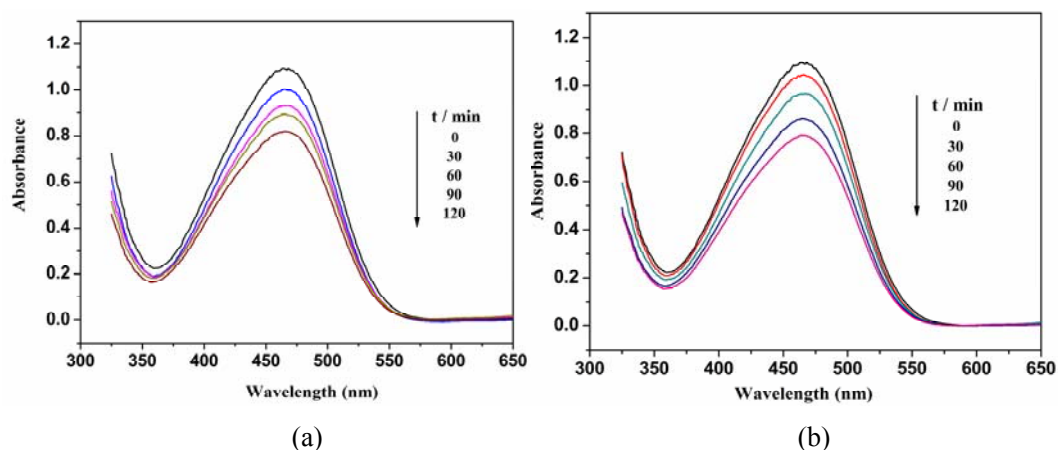

**Fig. S11.** Absorption spectra of the MO solution during the decomposition reaction with the use of compounds **2**(a) and **3**(b).

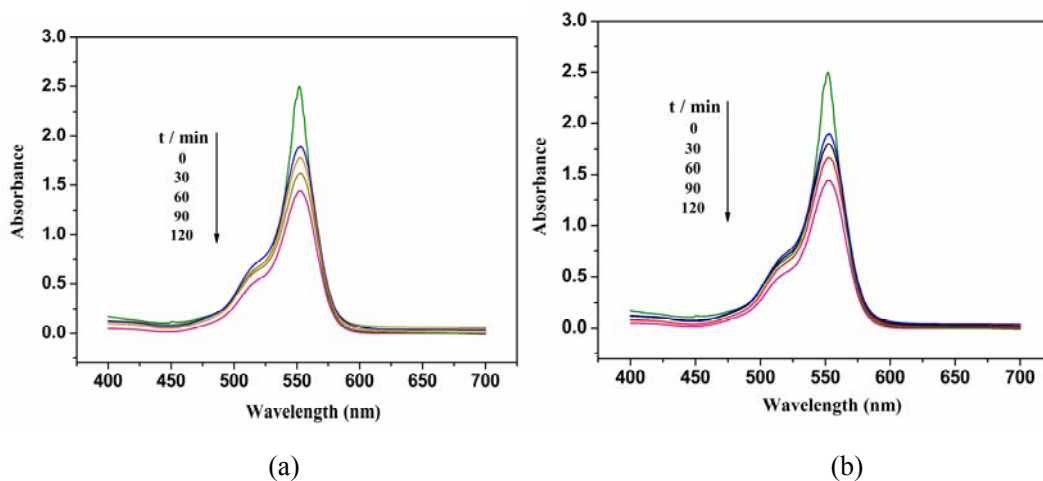

**Fig. S12.** Absorption spectra of the RhB solution during the decomposition reaction with the use of compounds **2** (a) and **3** (b).

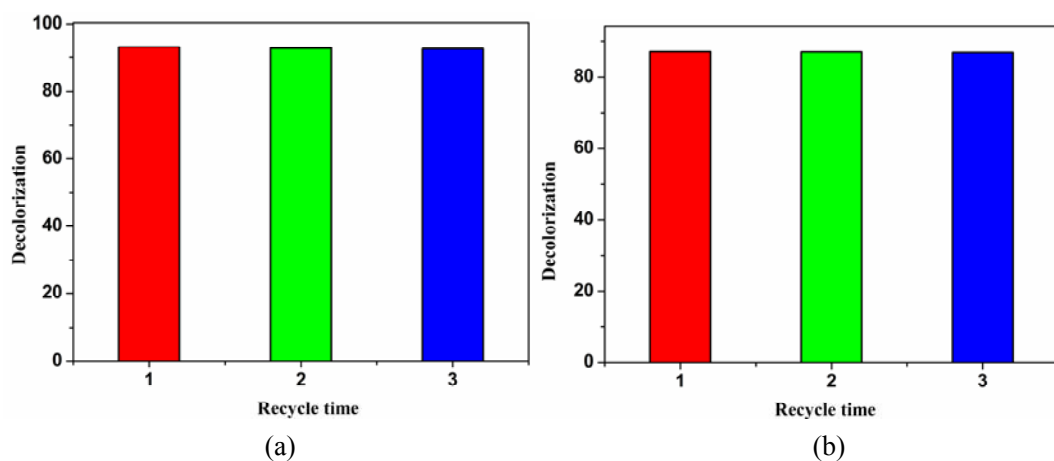

**Fig. S13.** Cycling runs of **2**(a) and **3**(b) in the degradation of MB solution.
